# Supplementary material
Source: Springer Nature journal article supplement (https://www.springermedizin.de/resource/supplementary/13054_2012_898_MOESM3_ESM.pdf/9709288)

| Study or Subgroup                                                                                             | Omega-3 |       |            | Control |       |            | Weight        | Mean Difference<br>IV, Random, 95% CI |
|---------------------------------------------------------------------------------------------------------------|---------|-------|------------|---------|-------|------------|---------------|---------------------------------------|
|                                                                                                               | Mean    | SD    | Total      | Mean    | SD    | Total      |               |                                       |
| <b>1.3.1 ICU patients</b>                                                                                     |         |       |            |         |       |            |               |                                       |
| Barbosa 2010                                                                                                  | 22      | 7     | 13         | 55      | 16    | 10         | 2.4%          | -33.00 [-43.62, -22.38]               |
| Berger 2008                                                                                                   | 8.89    | 1.98  | 12         | 9.93    | 2.76  | 12         | 10.4%         | -1.04 [-2.96, 0.88]                   |
| Friesecke 2008                                                                                                | 29      | 21.54 | 83         | 34      | 26.25 | 82         | 4.1%          | -5.00 [-12.33, 2.33]                  |
| Heller 2004                                                                                                   | 19.1    | 9.6   | 24         | 18.8    | 8.4   | 20         | 5.9%          | 0.30 [-5.02, 5.62]                    |
| Wachtler 1997                                                                                                 | 20.1    | 6.8   | 19         | 22.4    | 10.8  | 21         | 5.7%          | -2.30 [-7.84, 3.24]                   |
| Wang 2008                                                                                                     | 65.2    | 7.3   | 20         | 70.5    | 9.1   | 20         | 6.2%          | -5.30 [-10.41, -0.19]                 |
| Weiss 2002                                                                                                    | 17.8    | 3     | 12         | 23.5    | 3     | 11         | 9.7%          | -5.70 [-8.15, -3.25]                  |
| Wichmann 2007                                                                                                 | 17.2    | 6.7   | 127        | 21.9    | 8.7   | 129        | 10.5%         | -4.70 [-6.60, -2.80]                  |
| <b>Subtotal (95% CI)</b>                                                                                      |         |       | <b>310</b> |         |       | <b>305</b> | <b>55.0%</b>  | <b>-5.17 [-8.35, -1.99]</b>           |
| Heterogeneity: Tau <sup>2</sup> = 14.85; Chi <sup>2</sup> = 43.11, df = 7 (P < 0.00001); I <sup>2</sup> = 84% |         |       |            |         |       |            |               |                                       |
| Test for overall effect: Z = 3.18 (P = 0.001)                                                                 |         |       |            |         |       |            |               |                                       |
| <b>1.3.2 Not ICU patients</b>                                                                                 |         |       |            |         |       |            |               |                                       |
| Badia-Tahull 2010                                                                                             | 18.65   | 13    | 13         | 16.1    | 8.7   | 14         | 3.4%          | 2.55 [-5.86, 10.96]                   |
| Jiang 2010                                                                                                    | 15      | 5     | 100        | 17      | 8     | 103        | 10.6%         | -2.00 [-3.83, -0.17]                  |
| Klek 2005                                                                                                     | 14.4    | 9.28  | 29         | 16.4    | 9.9   | 29         | 6.4%          | -2.00 [-6.94, 2.94]                   |
| Liang 2008                                                                                                    | 17.45   | 4.8   | 20         | 19.62   | 5.59  | 21         | 8.7%          | -2.17 [-5.35, 1.01]                   |
| Makay 2011                                                                                                    | 13.1    | 6     | 14         | 14      | 6     | 12         | 6.8%          | -0.90 [-5.53, 3.73]                   |
| Mertes 2006                                                                                                   | 15.7    | 6.3   | 99         | 17.8    | 13.2  | 100        | 9.2%          | -2.10 [-4.97, 0.77]                   |
| <b>Subtotal (95% CI)</b>                                                                                      |         |       | <b>275</b> |         |       | <b>279</b> | <b>45.0%</b>  | <b>-1.86 [-3.13, -0.59]</b>           |
| Heterogeneity: Tau <sup>2</sup> = 0.00; Chi <sup>2</sup> = 1.31, df = 5 (P = 0.93); I <sup>2</sup> = 0%       |         |       |            |         |       |            |               |                                       |
| Test for overall effect: Z = 2.87 (P = 0.004)                                                                 |         |       |            |         |       |            |               |                                       |
| <b>Total (95% CI)</b>                                                                                         |         |       | <b>585</b> |         |       | <b>584</b> | <b>100.0%</b> | <b>-3.29 [-5.13, -1.45]</b>           |
| Heterogeneity: Tau <sup>2</sup> = 7.49; Chi <sup>2</sup> = 49.36, df = 13 (P < 0.00001); I <sup>2</sup> = 74% |         |       |            |         |       |            |               |                                       |
| Test for overall effect: Z = 3.50 (P = 0.0005)                                                                |         |       |            |         |       |            |               |                                       |
| Test for subgroup differences: Chi <sup>2</sup> = 3.58, df = 1 (P = 0.06), I <sup>2</sup> = 72.1%             |         |       |            |         |       |            |               |                                       |

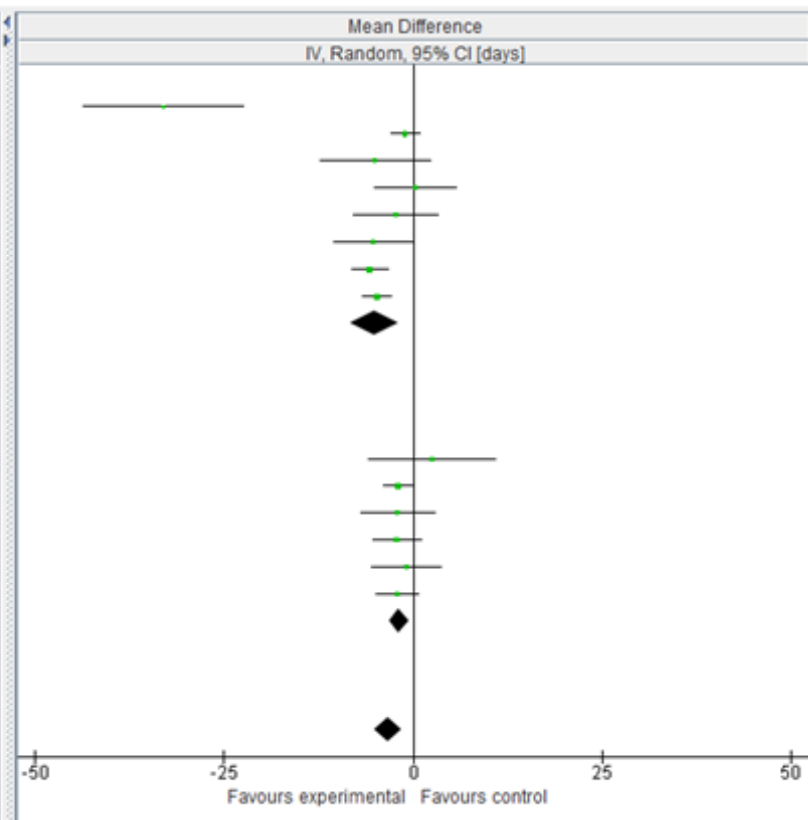

Supplement: MOESM3 [file 9709288]
